# Supplementary material for: Paintable and writable electrodes using black conductive ink on traditional Korean paper (Hanji)
Source: Royal Society of Chemistry journal article supplement (doi:10.1039/d0ra04412a), 2020-01-01
Supplement: d0ra04412a1.pdf [file d0ra04412a1.pdf]

## Supporting Information

# Paintable and Writable Electrodes Using Black Conductive Ink on Traditional Korean Paper (Hanji)

Yong Jun Kim<sup>a</sup>, Sunyoung Yoon<sup>a</sup>, Yong-Hwan Cho<sup>a</sup>, Gyewon Kim<sup>b</sup>, and Han-Ki Kim<sup>a\*</sup>

<sup>a</sup>School of Advanced Materials Science and Engineering, Sungkyunkwan University, Suwon, Gyeonggi-do 16419, Korea

<sup>b</sup>Department of Fine Arts, Sungkyunkwan University, 25-2, Sungkyunkwan-ro, Jongno-gu, Seoul, Republic of Korea

E-mail: [hankikim@skku.edu](mailto:hankikim@skku.edu) Fax: +82-31-201-2462; Tel: +82-31-205-2462

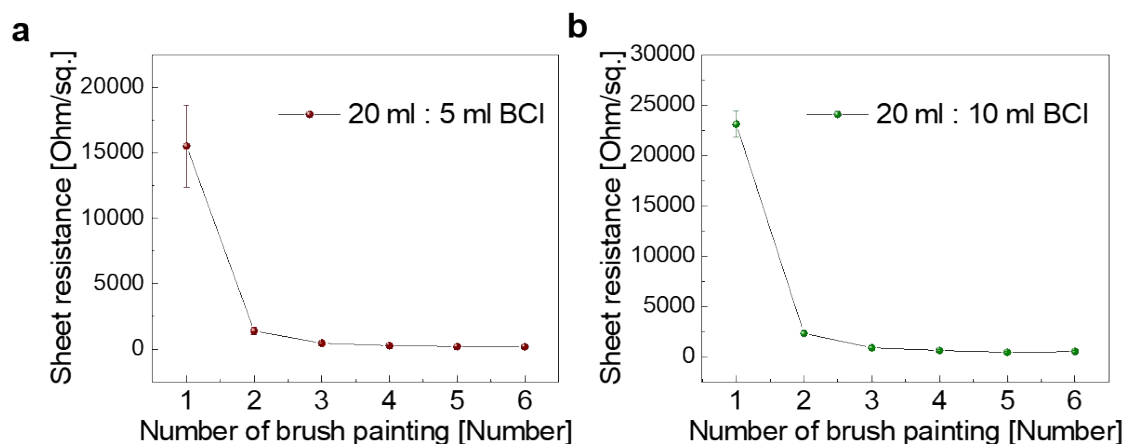

**Figure S1.** The sheet resistance change of brush painted electrode on Hanji using BCI with Ag NW suspension and PEDOT:PSS solution mixing ratio of (a) 20 ml : 5 ml and (b) 20 ml : 10 ml with increasing number of brush stroke.

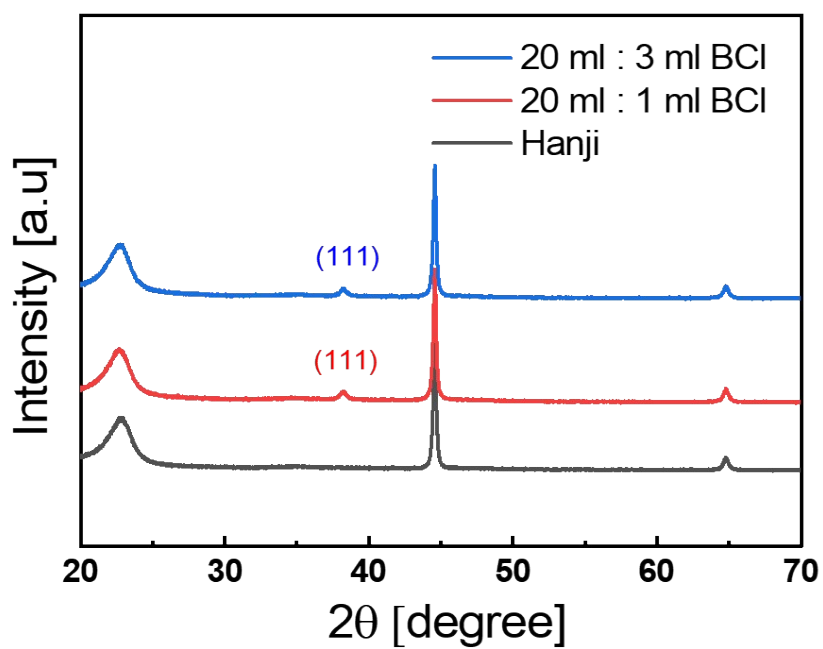

**Figure S2.** XRD plots of pristine-Hanji, brush painted electrodes on Hanji using BCI with Ag NW suspension and PEDOT:PSS solution mixing ratio of 20 ml : 1 ml and 20 ml : 3 ml.

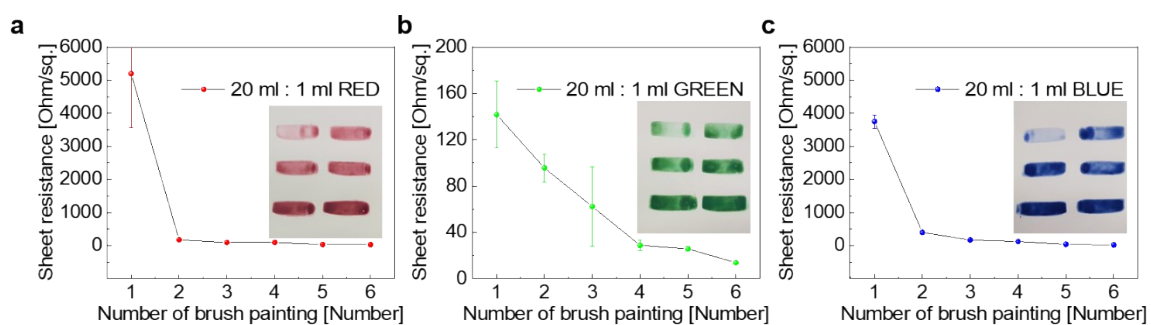

**Figure S3.** The resistance of brush painted electrode on typical sketch book using conductive ink (pre-BCI 20 ml : 1 ml) mixed with (a) red, (b) green, and (c) blue dye with increasing number of brush stroke. Inset shows the chromaticity change with increasing number of brush stroke.

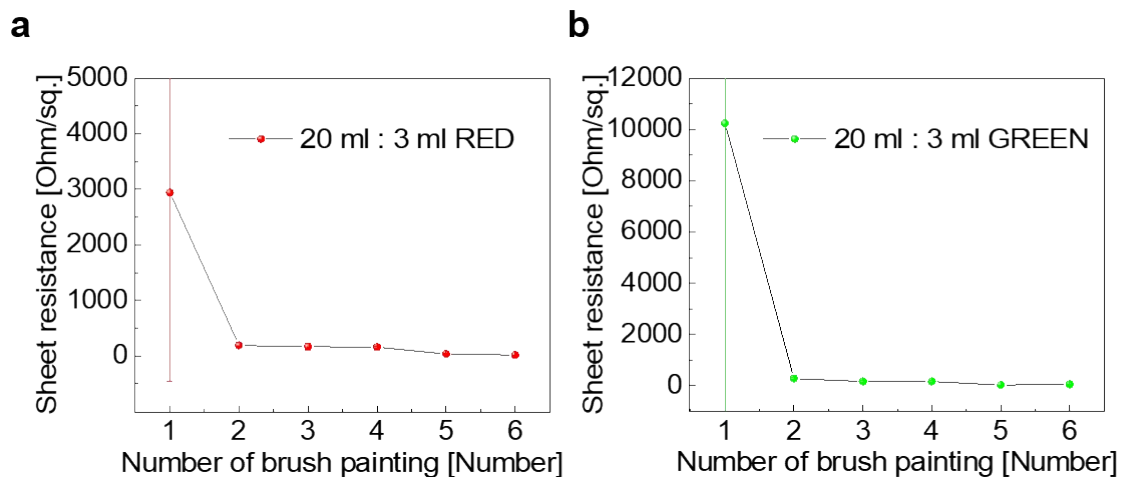

**Figure S4.** The resistance of brush painted electrode on typical sketch book using conductive ink (pre-BCI 20 ml : 3 ml) mixed with (a) red, and (b) green dye with increasing number of brush stroke.
